# Supplementary material
Source: publisher figshare collection journal article supplement (https://acs.figshare.com/ndownloader/files/4246528)

# ***Supporting information***

## **Mechanism for the Autophosphorylation of CheA Histidine Kinase: QM/MM Calculations**

Ting Shi<sup>1,3</sup>, Yunxiang Lu<sup>2</sup>, Xinyi Liu<sup>1</sup>, Yingyi Chen<sup>1</sup>, Hualiang Jiang<sup>3</sup>, Jian Zhang<sup>1,\*</sup>

*<sup>1</sup> Department of Pathophysiology, Key Laboratory of Cell Differentiation and  
Apoptosis of Chinese Ministry of Education, Shanghai JiaoTong University School of  
Medicine, Shanghai 200025, China;*

*<sup>2</sup> Department of Chemistry, East China University of Science and Technology,  
Shanghai 200237, China;*

*<sup>3</sup> Drug Discovery and Design Center, State Key Laboratory of Drug Research,  
Shanghai Institute of Materia Medica, Chinese Academy of Sciences, Shanghai  
201203, China*

**\*To whom correspondence should be addressed:** E-mail: jian.zhang@sjtu.edu.cn

**Figure S1.** The constructed 3D model of P1-P4-ATP complex

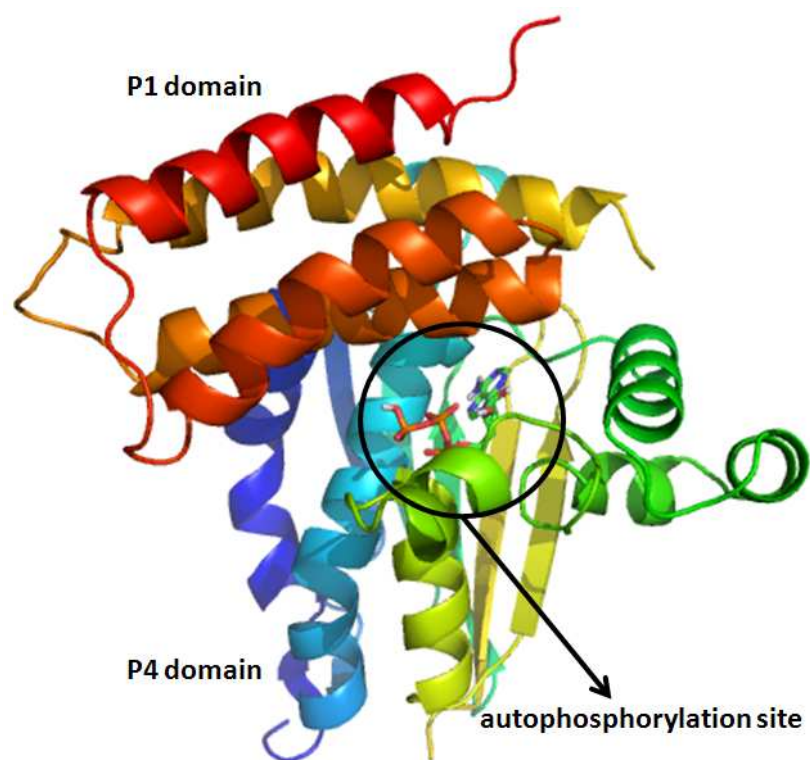

**Figure S2.** Key residues around the active site of P1-P4-ATP complex including His45, Thr46, Leu47, Lys48, Gly49, His64, Glu67, Arg160, Asn161, Ala162, His165, Gly166, Gly255 and Val256. Complex is shown in green; ATP in yellow and key residues in mauve.

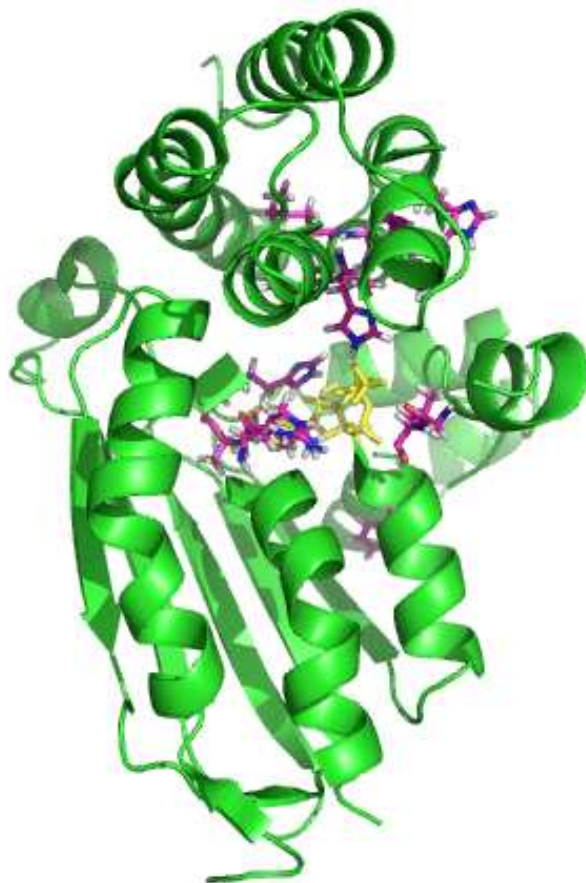

**Figure S3.** RMSD of C $^{\alpha}$  atoms in P1-P4-ATP complex (A) and RMSD of heavy atoms of the key residues (shown in the Supplementary **Figure S2**) and ATP around the active site in P1-P4-ATP complex (B) relative to the initial structure versus simulation time.

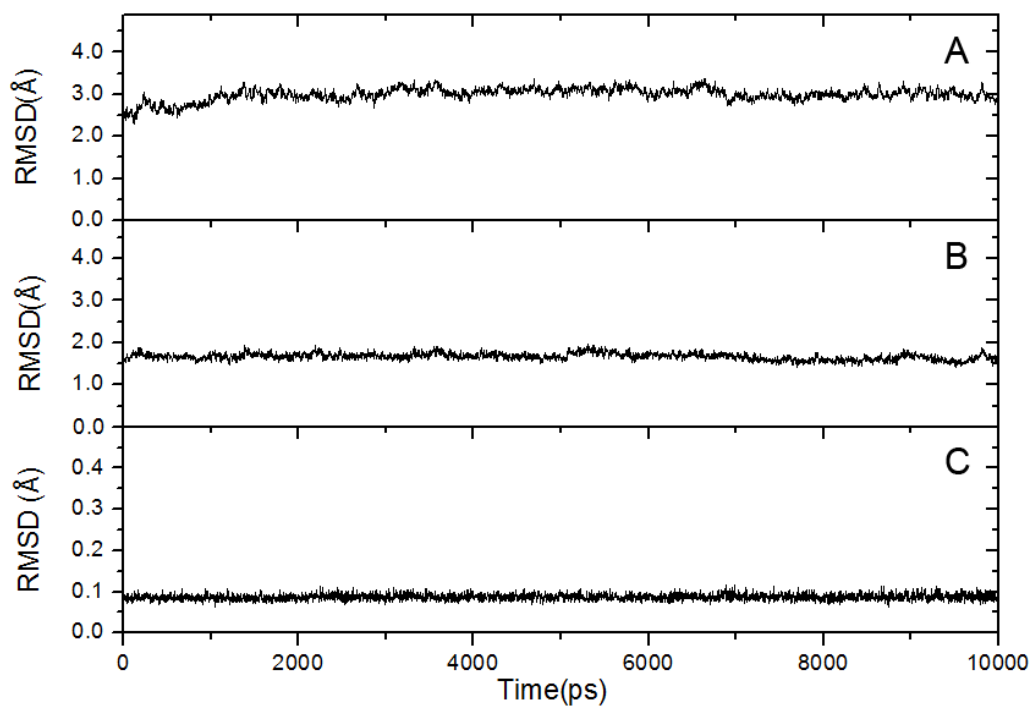

**Figure S4.** (A) The binding environment of  $O^\beta$  and  $O^\gamma$  atoms of ATP binding to  $Mg^{2+}$  ion in AMP-activated protein kinase (PDB ID code: 2V9J). (B) The binding environment of  $O^\alpha$ ,  $O^\beta$  and  $O^\gamma$  atoms of ATP binding to  $Mg^{2+}$  ion in  $P_{II}$  signal transduction protein (PDB ID code: 2ZXW). Yellow dashed lines represent the bond lengths between  $Mg^{2+}$  and O atoms of ATP.

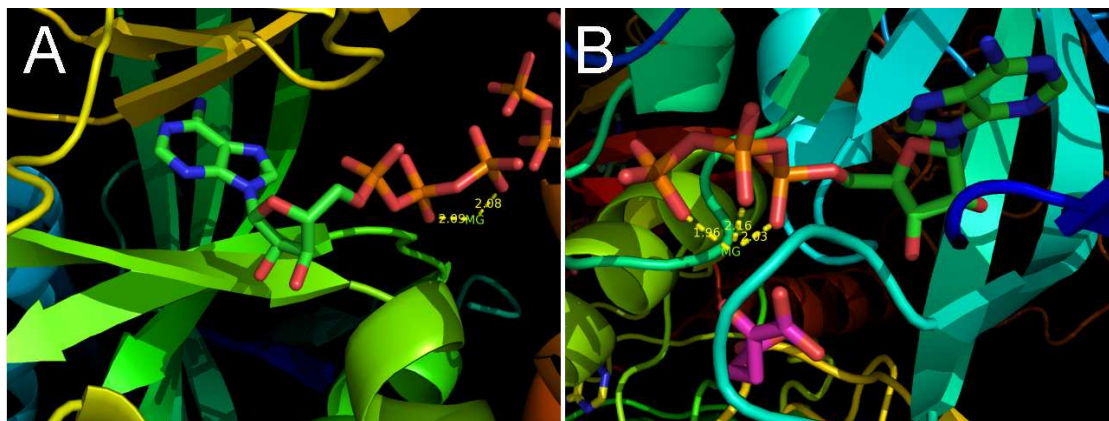

**Figure S5.** (A) The comparative view of catalytic environments between the R conformation and the M conformation in the P1-P4-ATP complex. ATP,  $Mg^{2+}$  and carbon atoms in the R conformation are colored in green and in the M conformation are colored in yellow. All side chains of crucial residues in the binding site are shown as stick and labeled. (B) The energy difference between the R conformation and the M conformation.

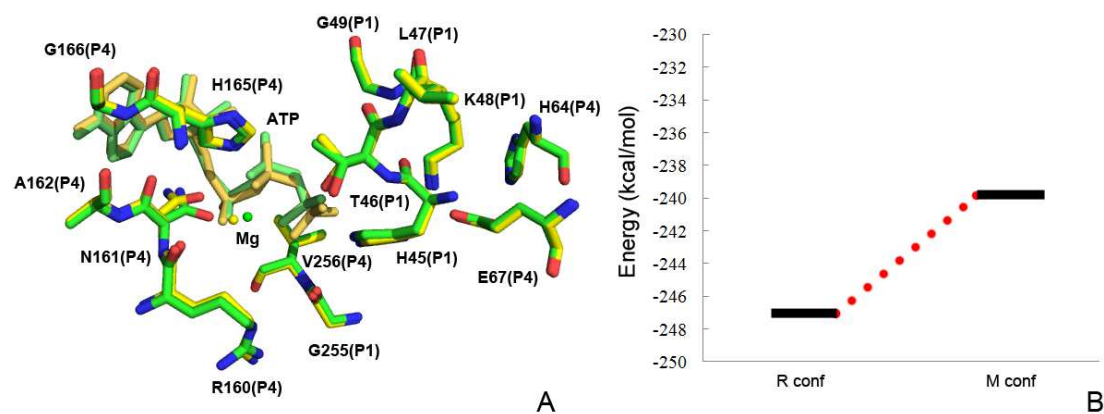

Supplement: Supplementary file 1 [file 4246528]
